# Supplementary material for: Global and regional carbon budget 2015–2020 inferred from OCO-2 based on an ensemble Kalman filter coupled with GEOS-Chem
Source: Copernicus journal article supplement (doi:10.5194/acp-2022-183), 2022-03-28
Supplement: Supplementary file 1 [file acp-2022-183-supplement.pdf]

*Supplement of*

# **Global and regional carbon budget 2015–2020 inferred from OCO-2 based on an ensemble Kalman filter coupled with GEOS-Chem**

Yawen Kong<sup>1</sup>, Bo Zheng<sup>2,3</sup>, Qiang Zhang<sup>1</sup>, Kebin He<sup>3,4</sup>

5 <sup>1</sup>Ministry of Education Key Laboratory for Earth System Modeling, Department of Earth System Science, Tsinghua University, Beijing 100084, China

<sup>2</sup>Institute of Environment and Ecology, Tsinghua Shenzhen International Graduate School, Tsinghua University, Shenzhen 518055, China

<sup>3</sup>State Environmental Protection Key Laboratory of Sources and Control of Air Pollution Complex, Beijing 100084, China

10 <sup>4</sup>State Key Joint Laboratory of Environment Simulation and Pollution Control, School of Environment, Tsinghua University, Beijing 100084, China

*Correspondence to:* Bo Zheng (bozheng@sz.tsinghua.edu.cn)

**Table S1. Surface flask measurement stations used for inversion model evaluation.**

| Station code | Latitude | Longitude | Elevation (m a.s.l.) | Station code | Latitude | Longitude | Elevation (m a.s.l.) |
|--------------|----------|-----------|----------------------|--------------|----------|-----------|----------------------|
| ALT          | 82.45    | -62.51    | 190                  | IZO          | 28.31    | -16.50    | 2377.9               |
| ZEP          | 78.91    | 11.89     | 479                  | MID          | 28.21    | -177.38   | 16                   |
| TIK          | 71.60    | 128.89    | 29                   | KEY          | 25.67    | -80.16    | 6                    |
| BRW          | 71.32    | -156.61   | 27.5                 | LLN          | 23.47    | 120.87    | 2867                 |
| PSL          | 67.97    | 24.12     | 570                  | ASK          | 23.26    | 5.63      | 2715                 |
| ICE          | 63.40    | -20.29    | 127                  | DSI          | 20.70    | 116.73    | 8                    |
| CBA          | 55.21    | -162.72   | 57.04                | KUM          | 19.52    | -154.82   | 8                    |
| MHD          | 53.33    | -9.90     | 26                   | GMI          | 13.39    | 144.66    | 5                    |
| SHM          | 52.71    | 174.13    | 28                   | RPB          | 13.16    | -59.43    | 20                   |
| TAC          | 52.52    | 1.14      | 236                  | CHR          | 1.70     | -157.15   | 5                    |
| OXK          | 50.03    | 11.81     | 1172                 | BKT          | -0.20    | 100.32    | 875                  |
| HPB          | 47.80    | 11.02     | 941                  | SEY          | -4.68    | 55.53     | 7                    |
| HUN          | 46.95    | 16.65     | 344                  | NAT          | -5.51    | -35.26    | 20                   |
| UUM          | 44.45    | 111.10    | 1012                 | ASC          | -7.97    | -14.40    | 90                   |
| CIB          | 41.81    | -4.93     | 850                  | SMO          | -14.25   | -170.56   | 47                   |
| THD          | 41.05    | -124.15   | 112                  | NMB          | -23.58   | 15.03     | 461                  |
| HSU          | 41.03    | -124.57   | 7.6                  | EIC          | -27.16   | -109.43   | 69                   |
| SDZ          | 40.65    | 117.12    | 298                  | CPT          | -34.35   | 18.49     | 260                  |
| UTA          | 39.90    | -113.72   | 1332                 | CGO          | -40.68   | 144.69    | 164                  |
| AZR          | 38.77    | -27.38    | 24                   | BHD          | -41.41   | 174.87    | 90                   |
| TAP          | 36.74    | 126.13    | 21                   | CRZ          | -46.43   | 51.85     | 202                  |
| SGP          | 36.61    | -97.49    | 374                  | USH          | -54.85   | -68.31    | 32                   |
| AMY          | 36.54    | 126.33    | 87                   | PSA          | -64.92   | -64.00    | 15                   |
| LMP          | 35.52    | 12.62     | 50                   | SYO          | -69.01   | 39.59     | 19                   |
| BMW          | 32.26    | -64.88    | 60                   | HBA          | -75.61   | -26.21    | 35                   |
| WIS          | 30.86    | 34.78     | 482                  | SPO          | -89.98   | -24.80    | 2815                 |

15 **Table S2. Aircraft measurement programs used for inversion model evaluation.**

| Measurement program code | Measurement program name                 | DOI                   | Reference                 |
|--------------------------|------------------------------------------|-----------------------|---------------------------|
| ABOVE                    | Arctic-Boreal Vulnerability Experiment   | 10.3334/ORNLDAAC/1658 | Sweeney and McKain (2019) |
| ACT                      | Atmospheric Carbon and Transport-America | 10.3334/ORNLDAAC/1593 | Davis et al. (2018)       |
| TOM                      | ATom, Atmospheric Tomography Mission     | 10.3334/ORNLDAAC/1732 | McKain and Sweeney (2021) |

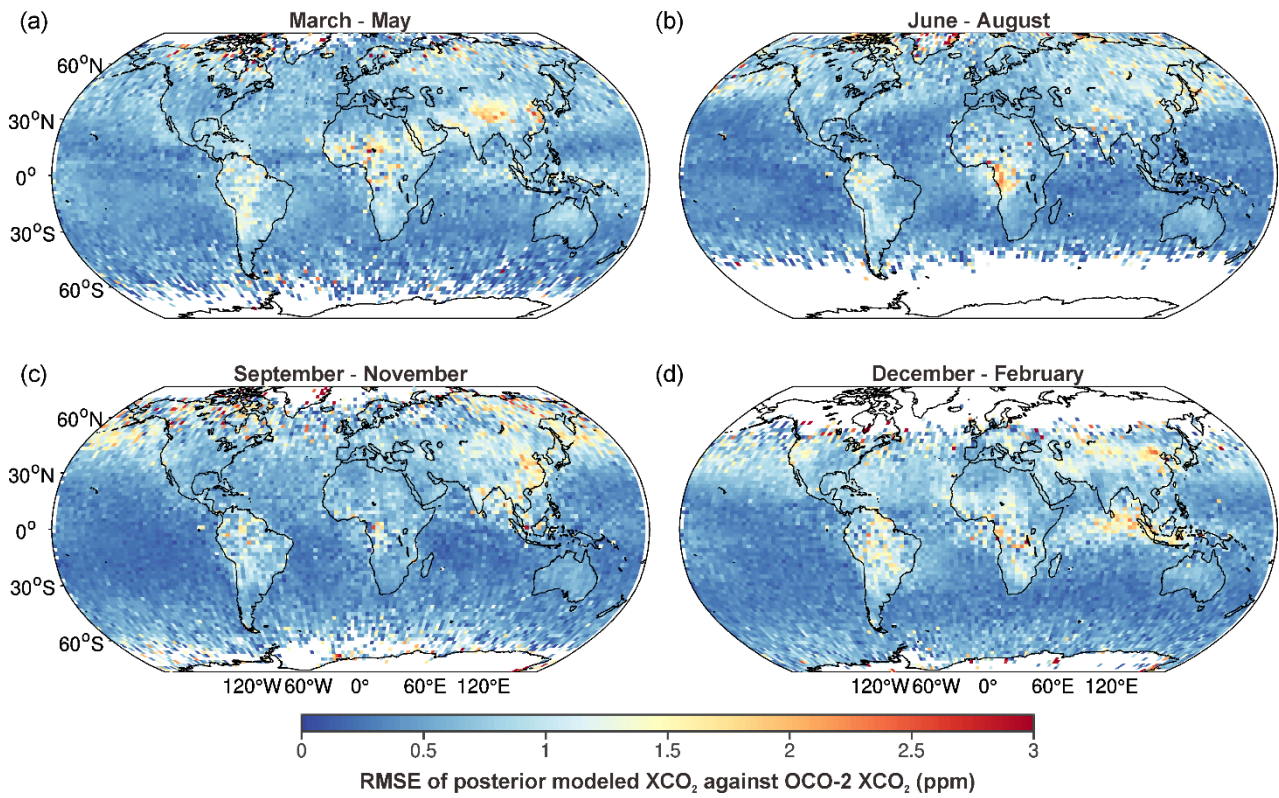

20 **Figure S1: Spatial and seasonal distributions of RMSE for the modeled XCO<sub>2</sub> against the OCO-2 XCO<sub>2</sub> between 2015 and 2020.** The modeled XCO<sub>2</sub> are derived from the GEOS-Chem model simulation driven by the posterior fluxes of our reference inversion. The RMSE is calculated and present for March–May (a), June–August (b), September–November (c), and December–February (d). The values shown here are the annual averages between 2015 and 2020.

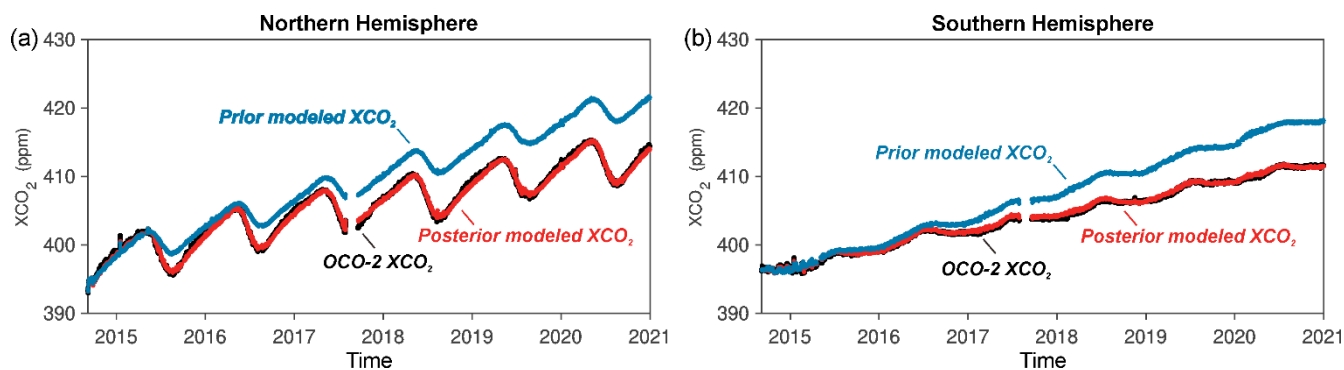

25 **Figure S2: Comparisons of the GEOS-Chem modeled  $XCO_2$  with OCO-2  $XCO_2$  at the daily scale between 2015 and 2020.** The GEOS-Chem simulations driven by the prior (blue curves) and the posterior (red curves) fluxes of our reference inversion are evaluated against the OCO-2  $XCO_2$  retrievals (black curves) over the Northern Hemisphere (a) and the Southern Hemisphere (b), respectively.

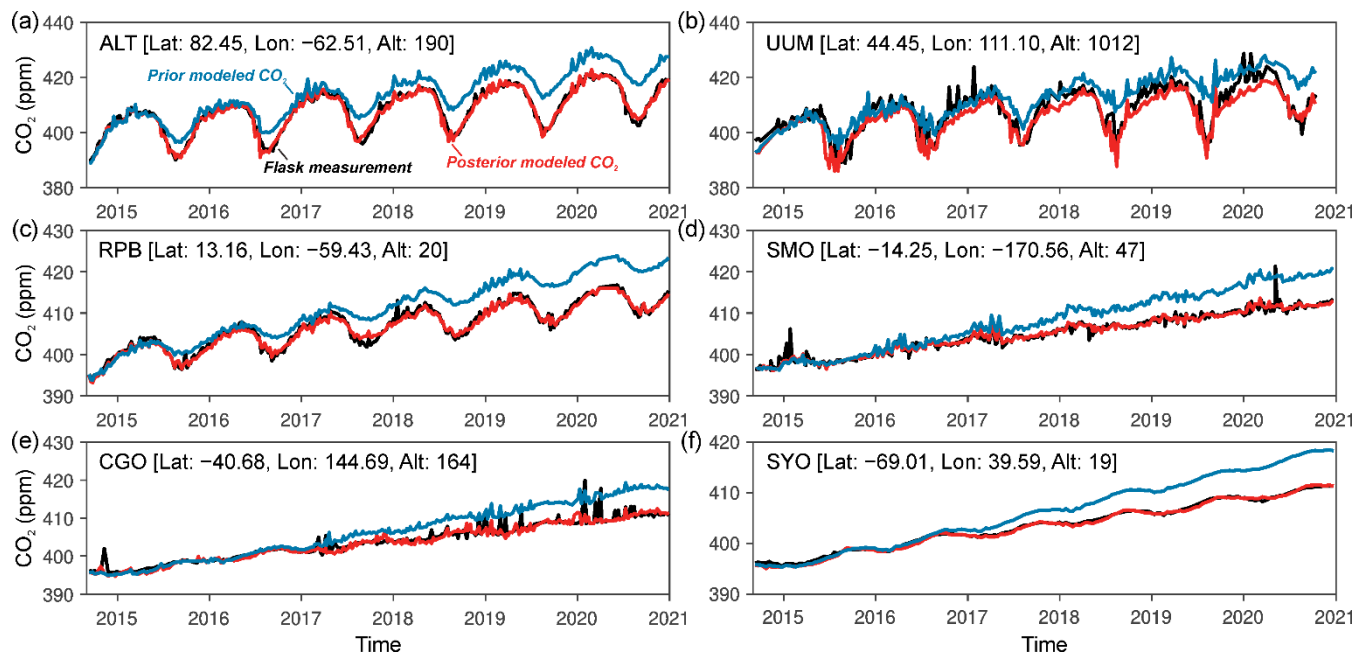

**Figure S3: Comparisons of the GEOS-Chem modeled CO<sub>2</sub> concentrations with surface flask measurement at the daily scale between 2015 and 2020.** The GEOS-Chem simulations driven by the prior (blue curves) and the posterior (red curves) fluxes of our reference inversion are evaluated against the flask measurement (black curves) from the surface stations of ALT (a), UUM (b), RPB (c), SMO (d), CGO (e), and SYO (f), which vary by latitude and by altitude and have continuous measurement records since 2014.

30

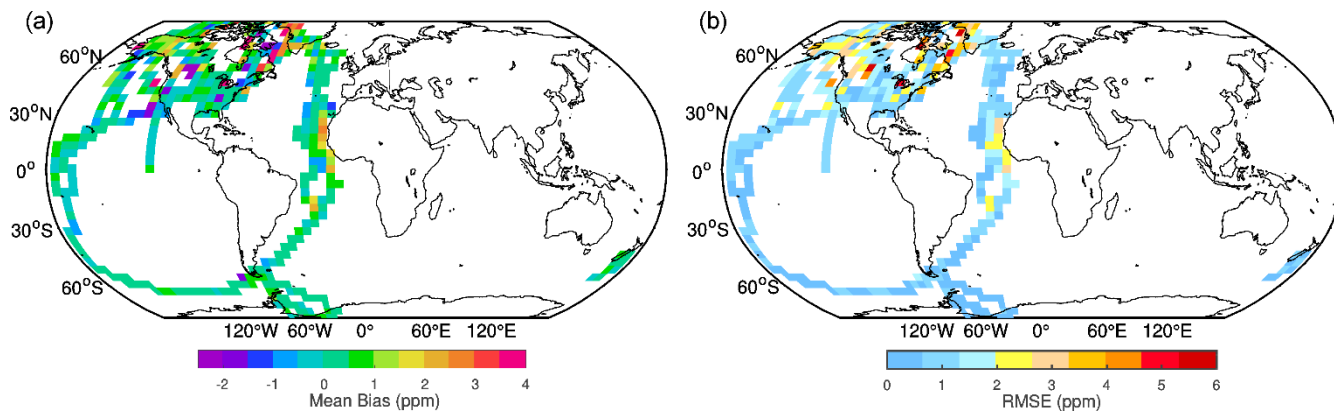

**Figure S4: Mean bias and RMSE for the GEOS-Chem modeled CO<sub>2</sub> concentrations against aircraft measurement.** The GEOS-Chem simulations driven by the posterior fluxes of our reference inversion are evaluated against the aircraft observations above 3000 m with biases (a) and RMSEs (b) shown in the GEOS-Chem 4° × 5° grid cells. The aircraft measurement programs are shown in Table S2.

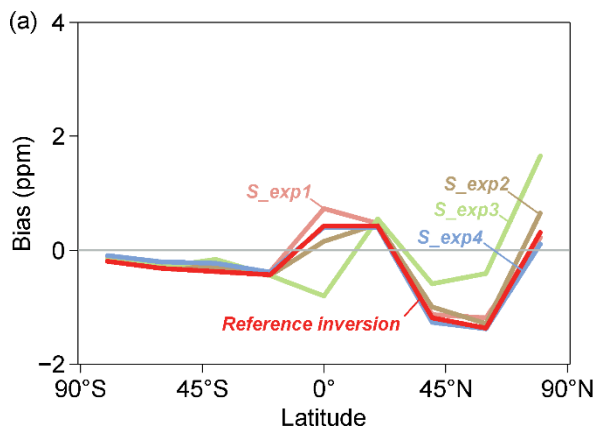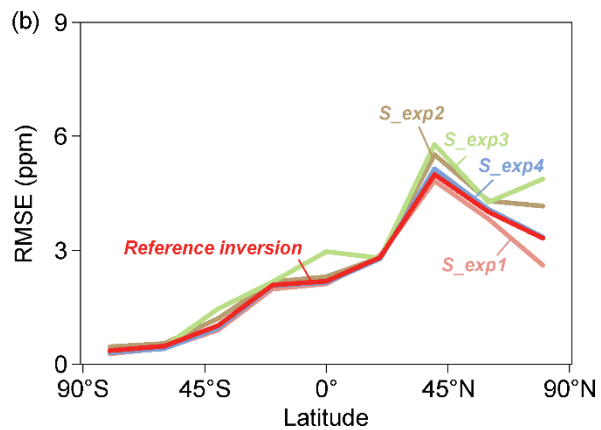

35

**Figure S5: Comparisons of the GEOS-Chem modeled dry air mole fractions of CO<sub>2</sub> with surface measurements for 2015.** The simulations driven by posterior fluxes from our reference inversion and four sensitivity inversions in 2015 are evaluated against surface flask observations for modeled biases (a) and RMSEs (b). The measurement sites are summarized in Table S1.



## References

- 40 Davis, K. J., Obland, M.D., Lin, B., Lauvaux, T., O'Dell, C., Meadows, B., Browell, E.V., DiGangi, J.P., Sweeney, C., McGill, M. J., Barrick, J.D., Nehrir, A. R., Yang, M. M., Bennett, J. R., Baier, B. C., Roiger, A., Pal, S., Gerken, T., Fried, A., Feng, S., Shrestha, R., Shook, M.A., Chen, G., Campbell, L. J., Barkley, Z. R., and Pauly, R. M.: ACT-America: L3 Merged In Situ Atmospheric Trace Gases and Flask Data, Eastern USA, ORNL DAAC, Oak Ridge, Tennessee, USA, doi: 10.3334/ORNLDAAC/1593, 2018.
- 45 McKain, K., and Sweeney, C.: ATom: CO<sub>2</sub>, CH<sub>4</sub>, and CO Measurements from Picarro, 2016-2018. ORNL DAAC, Oak Ridge, Tennessee, USA, doi: 10.3334/ORNLDAAC/1732, 2021.
- Sweeney, C., and McKain, K.: ABoVE: Atmospheric Profiles of CO, CO<sub>2</sub> and CH<sub>4</sub> Concentrations from Arctic-CAP, 2017, ORNL DAAC, Oak Ridge, Tennessee, USA, doi: 10.3334/ORNLDAAC/1658, 2019.
