# Supplementary material for: Global and regional carbon budget 2015–2020 inferred from OCO-2 based on an ensemble Kalman filter coupled with GEOS-Chem
Source: Copernicus journal article supplement (doi:10.5194/acp-2022-183), 2022-03-28
Supplement: Supplementary file [file acp-2022-183-AC1-supplement.pdf]

## Referee #1:

The authors present a new framework for performing atmospheric flux inversions. This framework is based on a four-dimensional local ensemble transform Kalman filter (4D-LETKF), with GEOS-Chem used as the transport model. The method is applied to version10r column-averaged CO<sub>2</sub> retrievals from the OCO-2 satellite over the five year period from 2015 to 2020. The estimated fluxes were found to be broadly consistent with those from other flux inversion systems. This represents the first application of a 4D-LETKF algorithm to perform an atmospheric inversion using OCO-2 data.

I find the paper to be well written and clear in general. The method is novel because it combines a high-dimensional grid-based parameterisation with an ensemble Kalman filtering approach. I appreciate that the authors performed sensitivity experiments to better understand what is driving the results. My main critique is that I find the mathematical description of the method lacking. My secondary critique relates to the lack of a discussion of the advantages or disadvantages of the method in comparison to other inversion systems.

## Response:

We thank the referee for the constructive and positive comments on our paper. We provide point-by-point responses as follows.

I found it difficult to understand the method based on Section 2.1. Here are my specific questions:

How are the ensemble members initialised?

## Response:

First, the perturbation matrix  $\mathbf{X}^b$  is generated through Cholesky decomposition to the covariance matrix  $\mathbf{B}$  (i.e.,  $\mathbf{B} = \mathbf{X}^b (\mathbf{X}^b)^T / (k - 1)$ ) to approximate the error structure of the control vector  $\mathbf{x}^b$ . Then the ensemble members  $\mathbf{x}^{b(i)}$   $\{i = 1, 2, \dots, k\}$  are initialized by adding the ensemble mean  $\bar{\mathbf{x}}^b$  (i.e., calculated as the average of optimized result from the two previous time steps and a fixed value of one) to the  $i$ th column of the perturbation matrix  $\mathbf{X}^b$ . We clarified this process in our revised manuscript as follows (Lines 117-121). The color of track changes is displayed in red.

Lines 117-121:

“The prior covariance matrix  $\mathbf{B}$  was constructed based on a normal distribution with the standard deviation of 3.0 within a spatial correlation length of 2000 km, and the spatial correlation of the prior flux errors between ocean and land is set to zero in our inversion. The ensemble perturbation matrix  $\mathbf{X}^b$  was constructed through Cholesky decomposition to  $\mathbf{B}$  (i.e.,  $\mathbf{B} = \mathbf{X}^b (\mathbf{X}^b)^T / (k - 1)$ ), and the ensemble members  $\mathbf{x}^{b(i)}$   $\{i = 1, 2, \dots, k\}$  were generated by adding the ensemble mean  $\bar{\mathbf{x}}^b$  to the  $i$ th column of  $\mathbf{X}^b$ .”

The matrix  $\mathbf{B}$  appears in equation (1) but not in equations (2)-(5). Is  $\mathbf{B}$  the error structure for  $\mathbf{x}^b$  that is mentioned in line 115? How does  $\mathbf{B}$  affect the posterior state if it does not appear in the calculations?

**Response:**

Yes,  $\mathbf{B}$  represents the error structure of  $\mathbf{x}^b$ , which is used to initialize the ensemble members  $\mathbf{x}^{b(i)}$  and thus affects the posterior state of our inversions (Hunt et al., 2007).

What is contained within the vector  $\mathbf{x}^b$  (and  $\mathbf{x}^a$ , and so on)? Is it the control variables (scaling factors) for the whole assimilation period (7 days), or is it just for the first day? If it's just the first day, what are the implied values for the next 6 days, which will affect the modelled concentrations  $y^{\{b(i)\}}$ ? Are these assumed to be equal to the prior mean? I looked at Figure~1 but I still could not understand what was happening.

**Response:**

The vectors  $\mathbf{x}^b$  and  $\mathbf{x}^a$  contain the scaling factors of emission fluxes for the first day of each assimilation window. For the next 6 days, these vectors adopt the prior mean  $\bar{\mathbf{x}}^b$ , which represents an average from the optimized scaling factors for the two previous time steps and the current first guess value one (Peters et al., 2007). The perturbations of the modelled CO<sub>2</sub> concentrations ( $\mathbf{y}^{b(i)}$ ) are related to the ensemble perturbations of fluxes on the first day ( $\mathbf{x}^b$ ), which lays the foundation for deriving  $\mathbf{x}^a$  for the first day through equations (2)–(5). We clarified it in the revised manuscript (Lines 126-128).

Lines 126-128:

“In each assimilation cycle, the ensemble members  $\mathbf{x}^{b(i)}$  (with the ensemble mean  $\bar{\mathbf{x}}^b$  and perturbations  $\mathbf{X}^b$  to approximate  $\mathbf{B}$ ) are initialized on the first day of the assimilation window, and the following 6 days use the same  $\bar{\mathbf{x}}^b$  without perturbation.”

Related to the last point, the calculation of  $\bar{\mathbf{x}}^b$  is described as "the average optimized result from the two previous time steps and a fixed value of one". Does this calculation apply to the new day entering the assimilation period, or to all the days?

**Response:**

This calculation applies to all 7 days within each assimilation window.

The modelled concentrations  $y^{\{b(i)\}}$  must also depend on state values from before the assimilation period. Are these set to the posterior mean, or are they different from each ensemble member? What is assumed exactly?

**Response:**

The ensemble mean of posterior fluxes ( $\bar{x}^a$ ) is used to update the carbon fluxes on the first day of each assimilation window and to drive a GEOS-Chem simulation to generate the initial CO<sub>2</sub> concentration fields for the next assimilation window (i.e., the next 7 days). The initial CO<sub>2</sub> fields are the same across different ensemble simulations ( $y^{b(i)}$ ). We have clarified this configuration in the revised manuscript (Lines 123-124).

Lines 123-124:

“The ensemble mean of  $\bar{x}^a$  is then used to update the carbon fluxes at the current **day**, thus driving another GEOS-Chem simulation to generate the initial CO<sub>2</sub> concentration fields for the next assimilation cycle.”

I find the notation regarding  $\bar{x}$  a little confusing. Is this the unweighted average of the ensemble members? I ask because  $\bar{x}^a$  and  $\bar{x}^b$  are not unweighted averages, so the notation is a little bit inconsistent.

**Response:**

$\bar{x}$  is the unweighted average of ensemble members.  $\bar{x}^a$  and  $\bar{x}^b$  represent the unweighted mean of the prior ( $x^a$ ) and posterior ( $x^b$ ) ensemble members, respectively.

How does the localisation length work? It is stated that "y<sup>o</sup> contains the assimilated OCO-2 XCO<sub>2</sub> within the assimilation window and localization length". Since the state vector contains every grid cell for a day, how can any observations be excluded by the localization length?

**Response:**

For the 4D-LETKF algorithm (Hunt et al., 2007), the state vector is optimized for each grid point independently. Therefore, the state vector contains only one grid for a day in each assimilation cycle, and only the OCO-2 observations within a specified distance (i.e., explicit localization length) around each grid cell are assimilated. We have added an introduction of this feature for LETKF in Lines 72-73 and Line 96.

Lines 72-73:

“**In LETKF, the analysis state can be solved at each model grid independently, and only the observations within a specified local area around each model grid are assimilated.**”

Line 96:

“Our system assimilates OCO-2 XCO<sub>2</sub> on an ongoing basis and optimizes carbon fluxes on the first day of each assimilation window **for each grid cell independently** by minimizing a cost function as follows (Eq. (1))”

I think it would help for the authors to discuss how their method compares to other methods. For example, a conventional 4D-Var system has a similar state space and a similar cost function. What, in the authors view, are the advantages of their method? I think just a short discussion of the most common methods and how they compare qualitatively to the authors method would be enough.

**Response:**

Thanks for this good suggestion. We have added a short discussion in Lines 399-419.

Lines 399-419:

“The ensemble methods such as 4D-LETKF used in this study have a major advantage over the variational methods (e.g., 4D-Var) in system development simplification, but the limited ensemble size and the short spatial-temporal localization window could reduce the estimation accuracy when there is a lack of sufficient CO<sub>2</sub> observations (Chatterjee and Michalak, 2013; Liu et al., 2016). The 4D-Var method uses an adjoint model to compute the sensitivity of CO<sub>2</sub> concentrations to surface fluxes, typically associated with a long assimilation window of years (e.g., Chevallier et al., 2005; Baker et al., 2006; Liu et al., 2016), which is accurate but computationally expensive. The 4D-LETKF algorithm relates surface carbon fluxes to CO<sub>2</sub> observations through ensemble simulations upon a short assimilation window of hours to months (e.g., Kang et al., 2011; Peters et al., 2005; Bruhwiler et al., 2005). The 4D-LETKF algorithm was designed for easy implementation and computational efficiency (Hunt et al., 2007), making it easier and faster to use in high-dimensional assimilation systems than the 4D-Var method.

The explicit localization scheme in space and time for 4D-LETKF ensures the accuracy and efficiency of flux estimation based on a moderate size of ensemble members (Miyoshi and Yamane, 2007), especially over regions with sufficient observations. For example, the 4D-LETKF algorithm can achieve comparable carbon fluxes to 4D-Var over regions with dense CO<sub>2</sub> observations (Liu et al., 2016). However, over observation-sparse regions, the localization scheme of 4D-LETKF makes it difficult to optimize fluxes effectively, while the 4D-Var method can optimize carbon fluxes based on observations over a broad region where CO<sub>2</sub> concentrations are sensitive to fluxes. Increasing the duration of the assimilation window and localization length can improve 4D-LETKF performance in this case, however, impose a heavy computational burden. Alternatively, several ensemble Kalman filter studies estimated carbon fluxes for ecoregions, which reduced the system dimensions to minimize the impacts of sampling errors and the lack of observational constraints on inversions (Peters et al., 2005; Feng et al., 2009). In the future, with the increased availability of satellite CO<sub>2</sub> observations, the 4D-LETKF algorithm has the potential to play a more important role in grid-scale inversions.”

## Minor comments

Line 151, what does the word "integrated" mean here? Does it mean that the flux field was shifted to have annual mean zero? How was this done?

### Response:

The word “integrated” means that the prior terrestrial biospheric fluxes are approximately equal to zero on an annual basis, although these fluxes have a seasonal cycle ( i.e., the monthly fluxes are not zero). This was done by the SiB4 model, a balanced land surface model which was designed to equate ecosystem respiration with gross primary production over one year at every grid point (Parazoo et al., 2008; Haynes et al., 2021). We have clarified this in Lines 156-157 as below.

Lines 156-157:

“We halved the gridded terrestrial biospheric fluxes to dampen the seasonal cycle and then integrated annual fluxes as zero over land **based on the balance between gross primary production and respiration in the SiB4 model**”

## References

- Hunt, B. R., Kostelich, E. J., and Szunyogh, I.: Efficient data assimilation for spatiotemporal chaos: A local ensemble transform Kalman filter, *Physica D: Nonlinear Phenomena*, 230, 112-126, doi: 10.1016/j.physd.2006.11.008, 2007.
- Peters, W., Jacobson, A. R., Sweeney, C., Andrews, A. E., Conway, T. J., Masarie, K., Miller, J. B., Bruhwiler, L. M. P., Pétron, G., Hirsch, A. I., Worthy, D. E. J., van der Werf, G. R., Randerson, J. T., Wennberg, P. O., Krol, M. C., and Tans, P. P.: An atmospheric perspective on North American carbon dioxide exchange: CarbonTracker, *Proc. Natl. Acad. Sci. U.S.A.*, 104, 18925-18930, doi: 10.1073/pnas.0708986104, 2007.
- Chatterjee, A. and Michalak, A. M.: Technical Note: Comparison of ensemble Kalman filter and variational approaches for CO<sub>2</sub> data assimilation, *Atmos. Chem. Phys.*, 13, 11643–11660, doi: 10.5194/acp-13-11643-2013, 2013.
- Chevallier, F., Fisher, M., Peylin, P., Serrar, S., Bousquet, P., Bréon, F. M., Chédin, A., and Ciais, P.: Inferring CO<sub>2</sub> sources and sinks from satellite observations: Method and application to TOVS data, *J. Geophys. Res. Atmos.*, 110, D24309, doi: 10.1029/2005JD006390, 2005.
- Baker, D. F., Doney, S. C., and Schimel, D. S.: Variational data assimilation for atmospheric CO<sub>2</sub>, *Tellus Series B-Chemical and Physical Meteorology*, 58, 359-365, doi:10.1111/j.1600-0889.2006.00218.x, 2006.
- Liu, J., Bowman, K. W., and Lee, M.: Comparison between the Local Ensemble Transform Kalman Filter (LETKF) and 4D-Var in atmospheric CO<sub>2</sub> flux inversion with the Goddard Earth Observing System-Chem model and the observation impact diagnostics from the LETKF, *J. Geophys. Res.-Atmos.*, 121, 13066-13087, doi: 10.1002/2016JD025100, 2016.
- Kang, J.-S., Kalnay, E., Liu, J., Fung, I., Miyoshi, T., and Ide, K.: “Variable localization” in an ensemble Kalman filter: application to the carbon cycle data assimilation, *J. Geophys. Res.*, 116, D09110, doi:10.1029/2010JD014673, 2011.

Peters, W., Miller, J., Whitaker, J., Denning, S., Hirsch, A., Krol, M., Zupanski, D., Bruhwiler, L., and Tans, P.: An ensemble data assimilation system to estimate CO<sub>2</sub> surface fluxes from atmospheric trace gas observations, *J. Geophys. Res.*, 110, D24304, doi:10.1029/2005JD006157, 2005.

Bruhwiler, L. M. P., Michalak, A. M., Peters, W., Baker, D. F., and Tans, P.: An improved Kalman Smoother for atmospheric inversions, *Atmos. Chem. Phys.*, 5, 2691-2702, doi: 10.5194/acp-5-2691-2005, 2005.

Miyoshi, T. and Yamane, S.: Local Ensemble Transform Kalman Filtering with an AGCM at a T159/L48 Resolution, *Mon. Weather Rev.*, 135, 3841-3861, doi:10.1175/2007MWR1873.1, 2007.

Feng, L., Palmer, P. I., Bösch, H., and Dance, S.: Estimating surface CO<sub>2</sub> fluxes from space-borne CO<sub>2</sub> dry air mole fraction observations using an ensemble Kalman Filter, *Atmos. Chem. Phys.*, 9, 2619-2633, doi: 10.5194/acp-9-2619-2009, 2009.

Parazoo, N. C., Denning, A. S., Kawa, S. R., Corbin, K. D., Lokupitiya, R. S., and Baker, I. T.: Mechanisms for synoptic variations of atmospheric CO<sub>2</sub> in North America, South America and Europe, *Atmos. Chem. Phys.*, 8, 7239–7254, doi: 10.5194/acp-8-7239-2008, 2008.

Haynes, K. D., Baker, I. T., and Denning, A. S.: SiB4 Modeled Global 0.5-Degree Hourly Carbon Fluxes and Productivity, 2000-2018, ORNL DAAC, Oak Ridge, Tennessee, USA., doi: 10.3334/ORNLDAAC/1847, 2021.
